# Supplementary material
Source: PubMed Central journal article supplement (PMC4289947)

## Supplementary Information

Blonanserin ameliorates phencyclidine-induced visual recognition memory deficits:  
The complex mechanism of blonanserin action involving D<sub>3</sub>-5-HT<sub>2A</sub> and D<sub>1</sub>-NMDA receptors in the mPFC

Hirotake Hida, Akihiro Mouri, Kentaro Mori, Yurie Matsumoto, Takeshi Seki, Masayuki Taniguchi,  
Kiyofumi Yamada, Kunihiro Iwamoto, Norio Ozaki, Toshitaka Nabeshima and Yukihiro Noda.

- Fig. S1.** Effect of blonanserin on Thr<sup>197</sup> phosphorylated PKA in the hippocampus and striatum of PCP-administered mice.
- Fig. S2.** Effect of blonanserin on Ser<sup>897</sup> phosphorylated NR1 in the hippocampus and striatum of PCP-administered mice.
- Fig. S3.** Effect of blonanserin on expression levels of NR1 mRNA in the medial prefrontal cortex (mPFC), hippocampus, and striatum of PCP-administered mice.

Fig. S1. Effect of blonanserin on Thr<sup>197</sup> phosphorylated PKA in the hippocampus and striatum of PCP-administered mice.

## Hippocampus

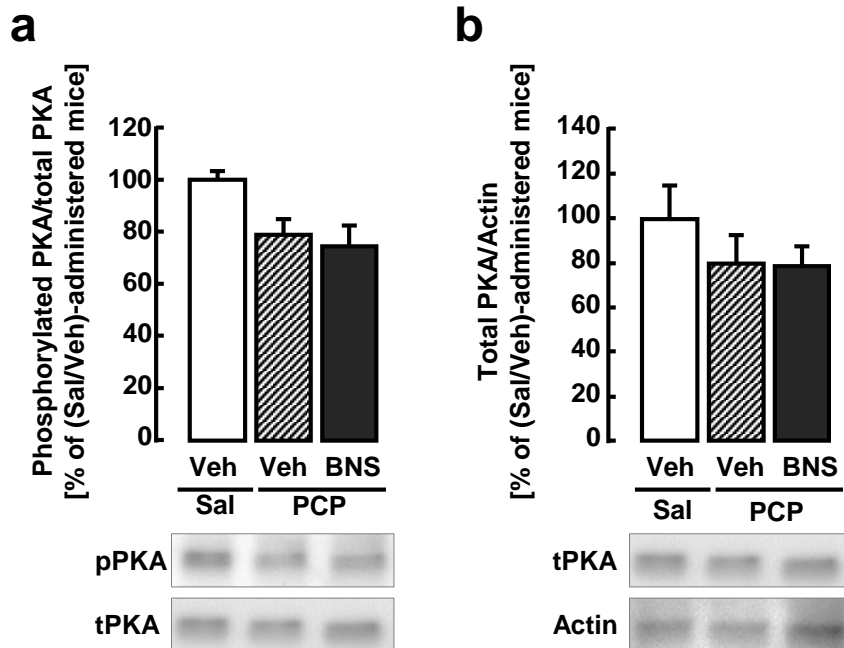

## Striatum

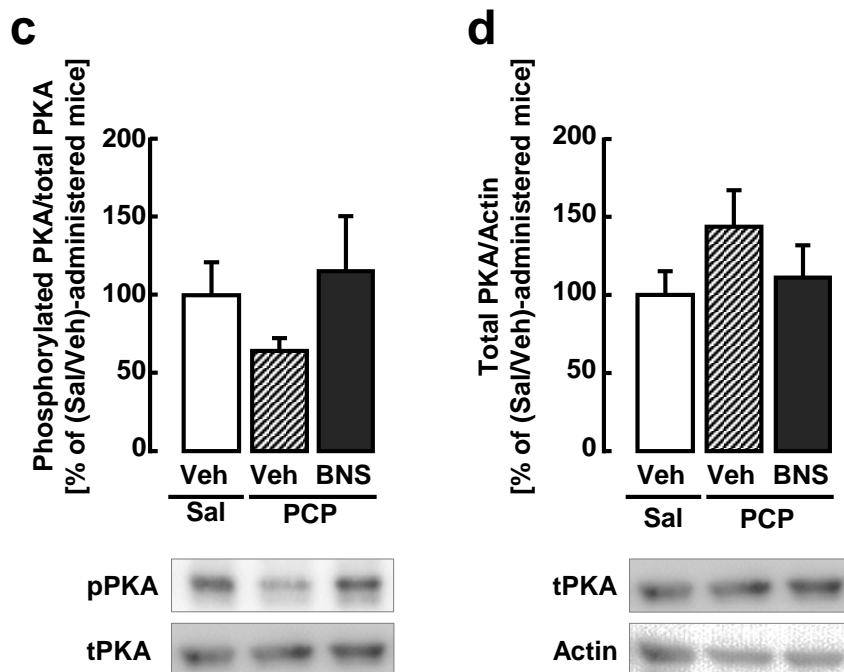

**Fig. S2.** Effect of blonanserin on Ser<sup>897</sup> phosphorylated NR1 in the hippocampus and striatum of PCP-administered mice.

## Hippocampus

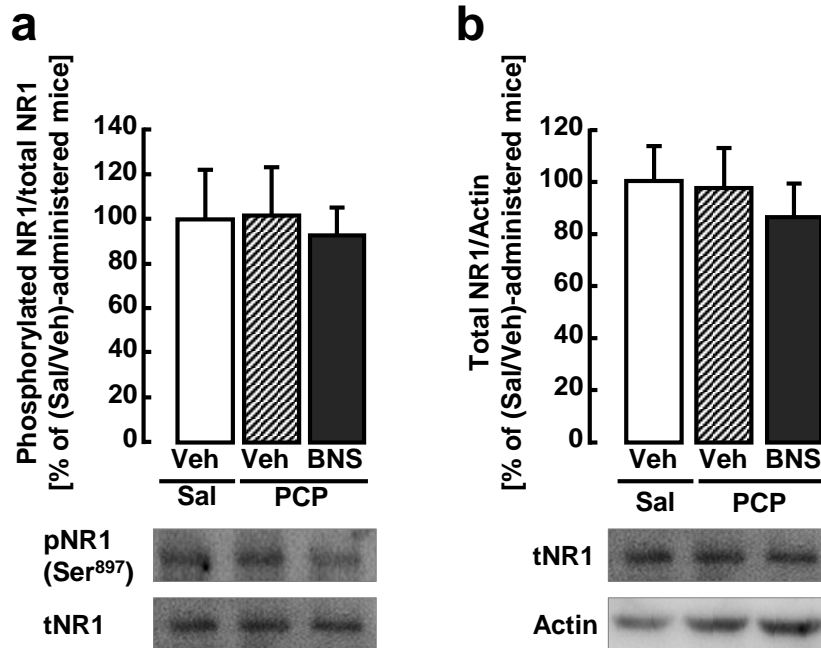

## Striatum

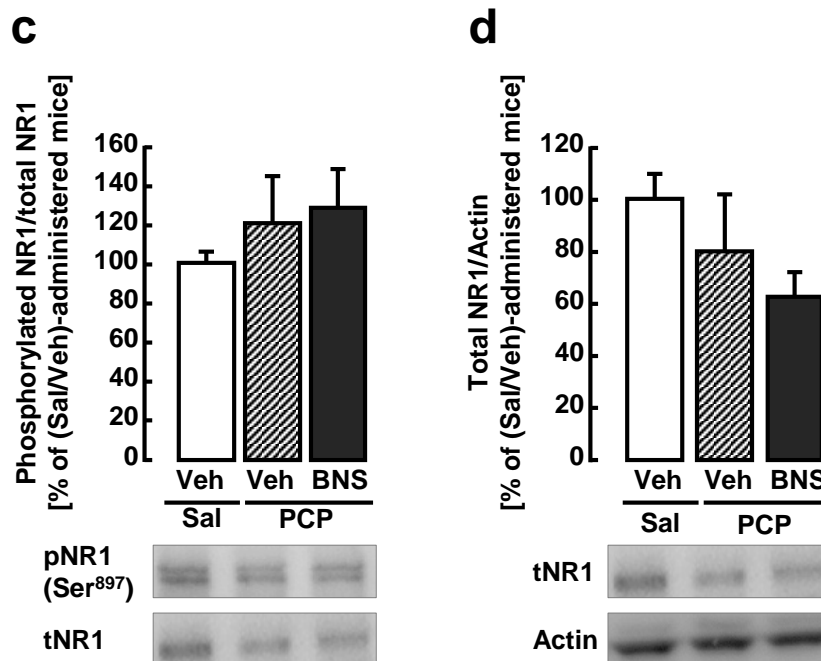

**Fig. S3.** Effect of blonanserin on expression levels of NR1 mRNA in the medial prefrontal cortex (mPFC), hippocampus and striatum of PCP-administered mice.

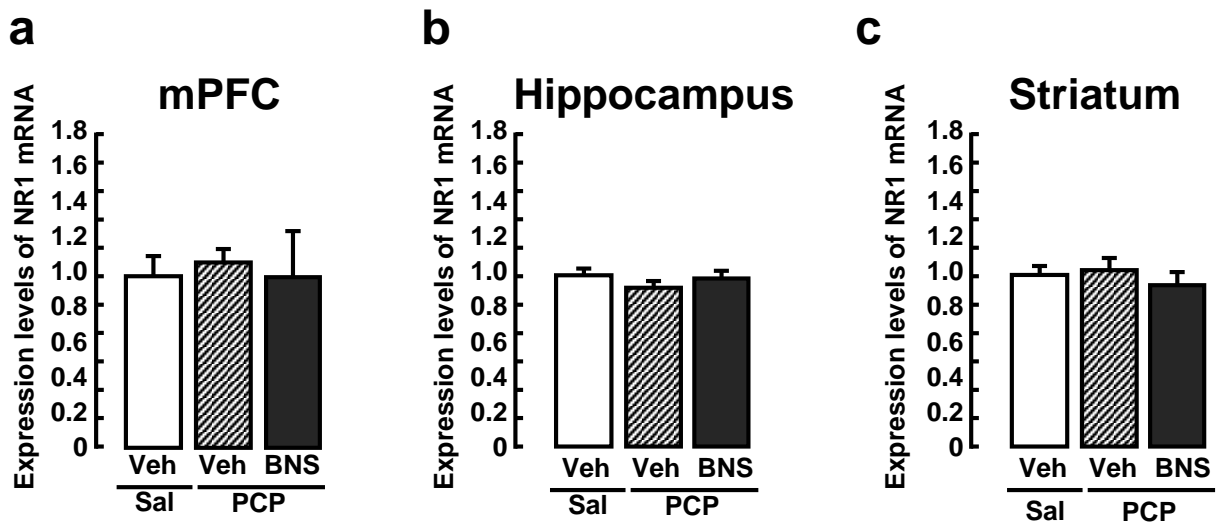

Supplement: npp2014207x1.pdf [file npp2014207x1.pdf]
